# Supplementary material for: Elevated Expression of the RNA-Binding Protein IGF2BP1 Enhances the Mrna Stability and Translation Efficiency of INHBA to Promote the Invasion and Migration of Esophageal Squamous Cancer Cells
Source: Research Square preprint supplement (doi:10.21203/rs.3.rs-885735/v1), 2021-09-21
Supplement: Supplementary file 1 [file c3049b5a5e8c0a2cf3a9f34e.xlsx]

## Sheet: Table S12
Table S12. Candidate interacting proteins of IGF2BP1 selected from Co-IP-MS.
ProteinID	ProteinName	GeneName	Subcellular locations	BP	MF	CC	GO_Term	ΣCoverage	Σ# Proteins	Σ# Unique Peptides	Σ# Peptides	Σ# PSMs	Coverage CONT1	# Peptides CONT1	# PSM CONT1	Coverage M1_1	# Peptides M1_1	# PSM M1_1	Coverage M1_2	# Peptides M1_2	# PSM M1_2	# AAs	MW [kDa]	calc. pI
Q13283	Ras GTPase-activating protein-binding protein 1	G3BP1	Cytoplasm, cytosol. Perikaryon. Cytoplasm, Stress granule. Nucleus.	innate immune response [GO:0045087];defense response to virus [GO:0051607];negative regulation of canonical Wnt signaling pathway [GO:0090090];stress granule assembly [GO:0034063];viral process [GO:0016032];positive regulation of stress granule assembly [GO:0062029];-;Ras protein signal transduction [GO:0007265];type I interferon production [GO:0032606]	DNA binding [GO:0003677];ATP binding [GO:0005524];-;mRNA binding [GO:0003729];RNA helicase activity [GO:0003724];DNA helicase activity [GO:0003678];RNA binding [GO:0003723];endonuclease activity [GO:0004519]	cytosol [GO:0005829];ribonucleoprotein complex [GO:1990904];cytoplasm [GO:0005737];perikaryon [GO:0043204];cytoplasmic stress granule [GO:0010494];nucleus [GO:0005634];-;focal adhesion [GO:0005925]	innate immune response [GO:0045087];defense response to virus [GO:0051607];negative regulation of canonical Wnt signaling pathway [GO:0090090];stress granule assembly [GO:0034063];viral process [GO:0016032];positive regulation of stress granule assembly [GO:0062029];-;Ras protein signal transduction [GO:0007265];type I interferon production [GO:0032606];DNA binding [GO:0003677];ATP binding [GO:00…	32.19	12	9	10	34				32.19	10	26	6.01	2	2	466	52.1321	5.51611
Q08211	ATP-dependent RNA helicase A	DHX9	Nucleus. Nucleus, nucleoplasm. Nucleus, nucleolus. Cytoplasm.	CRD-mediated mRNA stabilization [GO:0070934];pyroptosis [GO:0070269];mRNA splicing, via spliceosome [GO:0000398];targeting of mRNA for destruction involved in RNA interference [GO:0030423];mRNA transport [GO:0051028];DNA-templated transcription, termination [GO:0006353];inflammatory response [GO:0006954];DNA duplex unwinding [GO:0032508];positive regulation of NF-kappaB transcription factor activ…	RNA polymerase II cis-regulatory region sequence-specific DNA binding [GO:0000978];DNA binding [GO:0003677];RNA polymerase II transcription factor binding [GO:0001085];single-stranded DNA binding [GO:0003697];triplex DNA binding [GO:0045142];double-stranded DNA binding [GO:0003690];double-stranded RNA binding [GO:0003725];RISC complex binding [GO:1905172];RNA binding [GO:0003723];RNA polymerase I…	actin cytoskeleton [GO:0015629];membrane [GO:0016020];polysome [GO:0005844];cytoplasmic ribonucleoprotein granule [GO:0036464];protein-containing complex [GO:0032991];nuclear body [GO:0016604];CRD-mediated mRNA stability complex [GO:0070937];nucleolus [GO:0005730];nucleoplasm [GO:0005654];nuclear stress granule [GO:0097165];RISC complex [GO:0016442];RISC-loading complex [GO:0070578];perichromatin…	CRD-mediated mRNA stabilization [GO:0070934];pyroptosis [GO:0070269];mRNA splicing, via spliceosome [GO:0000398];targeting of mRNA for destruction involved in RNA interference [GO:0030423];mRNA transport [GO:0051028];DNA-templated transcription, termination [GO:0006353];inflammatory response [GO:0006954];DNA duplex unwinding [GO:0032508];positive regulation of NF-kappaB transcription factor activ…	23.78	4	25	25	40	5.98	7	7	17.87	20	25				1270	140.869	6.84424
Q9UN86	Ras GTPase-activating protein-binding protein 2	G3BP2	Cytoplasm. Cytoplasm, Stress granule.	cytoplasmic sequestering of NF-kappaB [GO:0007253];innate immune response [GO:0045087];stress granule assembly [GO:0034063];viral process [GO:0016032];positive regulation of stress granule assembly [GO:0062029];mRNA transport [GO:0051028];-;protein homooligomerization [GO:0051260];Ras protein signal transduction [GO:0007265]	mRNA binding [GO:0003729];-;signaling receptor complex adaptor activity [GO:0030159];RNA binding [GO:0003723]	cytosol [GO:0005829];cytoplasm [GO:0005737];cytoplasmic stress granule [GO:0010494];-;ribonucleoprotein complex [GO:1990904]	cytoplasmic sequestering of NF-kappaB [GO:0007253];innate immune response [GO:0045087];stress granule assembly [GO:0034063];viral process [GO:0016032];positive regulation of stress granule assembly [GO:0062029];mRNA transport [GO:0051028];-;protein homooligomerization [GO:0051260];Ras protein signal transduction [GO:0007265];mRNA binding [GO:0003729];-;signaling receptor complex adaptor activity …	24.69	13	10	11	35	2.7	1	1	24.69	10	18	2.7	1	1	482	54.0878	5.5542
Q6PKG0	La-related protein 1	LARP1	Cytoplasm. Cytoplasmic granule.	positive regulation of viral genome replication [GO:0045070];TOR signaling [GO:0031929];mRNA stabilization [GO:0048255];response to amino acid starvation [GO:1990928];positive regulation of translational initiation [GO:0045948];cell population proliferation [GO:0008283];TORC1 signaling [GO:0038202];-;translational initiation [GO:0006413];negative regulation of translational initiation [GO:0045947…	ribosomal small subunit binding [GO:0043024];mRNA 5'-UTR binding [GO:0048027];mRNA 3'-UTR binding [GO:0003730];translation activator activity [GO:0008494];-;RNA cap binding [GO:0000339];RNA 7-methylguanosine cap binding [GO:0000340];cadherin binding [GO:0045296];RNA binding [GO:0003723];eukaryotic initiation factor 4E binding [GO:0008190];translation initiation factor binding [GO:0031369]	membrane [GO:0016020];-;cytoplasm [GO:0005737];cytoplasmic stress granule [GO:0010494]	positive regulation of viral genome replication [GO:0045070];TOR signaling [GO:0031929];mRNA stabilization [GO:0048255];response to amino acid starvation [GO:1990928];positive regulation of translational initiation [GO:0045948];cell population proliferation [GO:0008283];TORC1 signaling [GO:0038202];-;translational initiation [GO:0006413];negative regulation of translational initiation [GO:0045947…	7.66	9	8	8	10				7.66	8	8	1.46	2	2	1096	123.434	8.82178
R9WQY1	Synaptic functional regulator FMR1	FMR1	Nucleus. Nucleus, nucleolus. Chromosome, centromere. Chromosome. Cytoplasm.	mRNA processing [GO:0006397];regulation of translation [GO:0006417];-;nervous system development [GO:0007399];RNA splicing [GO:0008380]	mRNA binding [GO:0003729];-	filopodium tip [GO:0032433];perinuclear region of cytoplasm [GO:0048471];nucleolus [GO:0005730];perikaryon [GO:0043204];cytoplasmic stress granule [GO:0010494];chromosome, centromeric region [GO:0000775];-;dendritic spine [GO:0043197];plasma membrane [GO:0005886];growth cone [GO:0030426]	mRNA processing [GO:0006397];regulation of translation [GO:0006417];-;nervous system development [GO:0007399];RNA splicing [GO:0008380];mRNA binding [GO:0003729];-;filopodium tip [GO:0032433];perinuclear region of cytoplasm [GO:0048471];nucleolus [GO:0005730];perikaryon [GO:0043204];cytoplasmic stress granule [GO:0010494];chromosome, centromeric region [GO:0000775];-;dendritic spine [GO:0043197];…	12.54	11	1	7	12	1.41	1	1	8.48	5	7				566	63.9424	8.39697
A0A024R609	Pyruvate kinase	PKM2	Cytoplasm. Nucleus.	-	ATP binding [GO:0005524];pyruvate kinase activity [GO:0004743];potassium ion binding [GO:0030955];kinase activity [GO:0016301];magnesium ion binding [GO:0000287]	-	-;ATP binding [GO:0005524];pyruvate kinase activity [GO:0004743];potassium ion binding [GO:0030955];kinase activity [GO:0016301];magnesium ion binding [GO:0000287];-	11.88	19	3	3	7	3.19	1	1	11.88	3	3	3.77	1	1	345	37.5343	6.39209
B5BU99	High glucose-regulated protein 8	YTHDF2	Cytoplasm, cytosol. Cytoplasm, P-body. Cytoplasm, Stress granule. Nucleus.	-	RNA binding [GO:0003723]	-	-;RNA binding [GO:0003723];-	5.44	2	1	3	4				5.44	3	3				570	61.2822	9.1001
H0YJX6	Protein arginine N-methyltransferase 5	PRMT5	Cytoplasm. Nucleus. Chromosome. Golgi apparatus.	peptidyl-arginine N-methylation [GO:0035246];-	-;methyltransferase activity [GO:0008168]	-	peptidyl-arginine N-methylation [GO:0035246];-;-;methyltransferase activity [GO:0008168];-	8.24	8	2	2	2				8.24	2	2				279	32.2913	5.90967
